# Supplementary material for: When MOFs meet MXenes: superior ORR performance in both alkaline and acidic solutions
Source: Royal Society of Chemistry journal article supplement (doi:10.1039/d0ta10811a), 2020-12-14
Supplement: d0ta10811a1.pdf [file d0ta10811a1.pdf]

## Supporting Information

### When MOFs Meet MXenes: Superior ORR Performance in Both Alkaline and Acid Solutions

Wen-Tao Wang<sup>a,b</sup>, Nadia Batool<sup>a,b</sup>, Tian-Heng Zhang<sup>a,b</sup>, Jiao Liu<sup>a,b,c</sup>, Xiao-Feng Han<sup>a,b</sup>,  
Jing-Hua Tian<sup>a,b\*</sup> and Ruizhi Yang<sup>a,b\*</sup>

<sup>a</sup> College of Energy, Soochow Institute for Energy and Materials InnovationS & Collaborative Innovation Center of Suzhou Nano Science and Technology, Soochow University, Suzhou 215006, China.

<sup>b</sup> Key Laboratory of Advanced Carbon Materials and Wearable Energy Technologies of Jiangsu Province, Soochow University, Suzhou 215006, China

<sup>c</sup> Department of Chemistry, Soochow University, No. 199 Renai Road, Suzhou 215123, China

\* Corresponding authors (emails: jhtian@suda.edu.cn(J.-H. Tian); yangrz@suda.edu.cn(R. Yang))

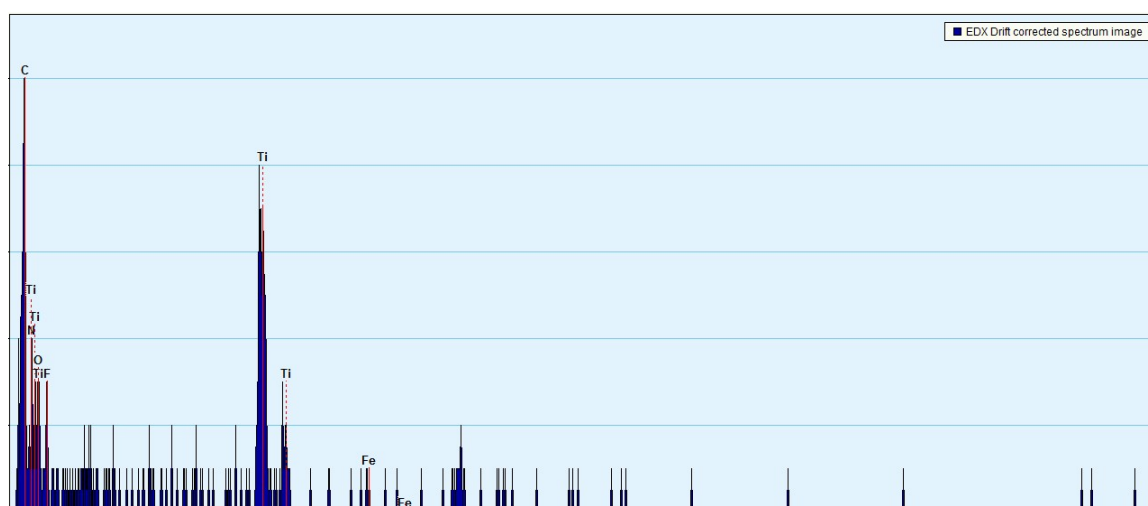

Figure S1. EDX spectrum of Fe-N-C@MXene.

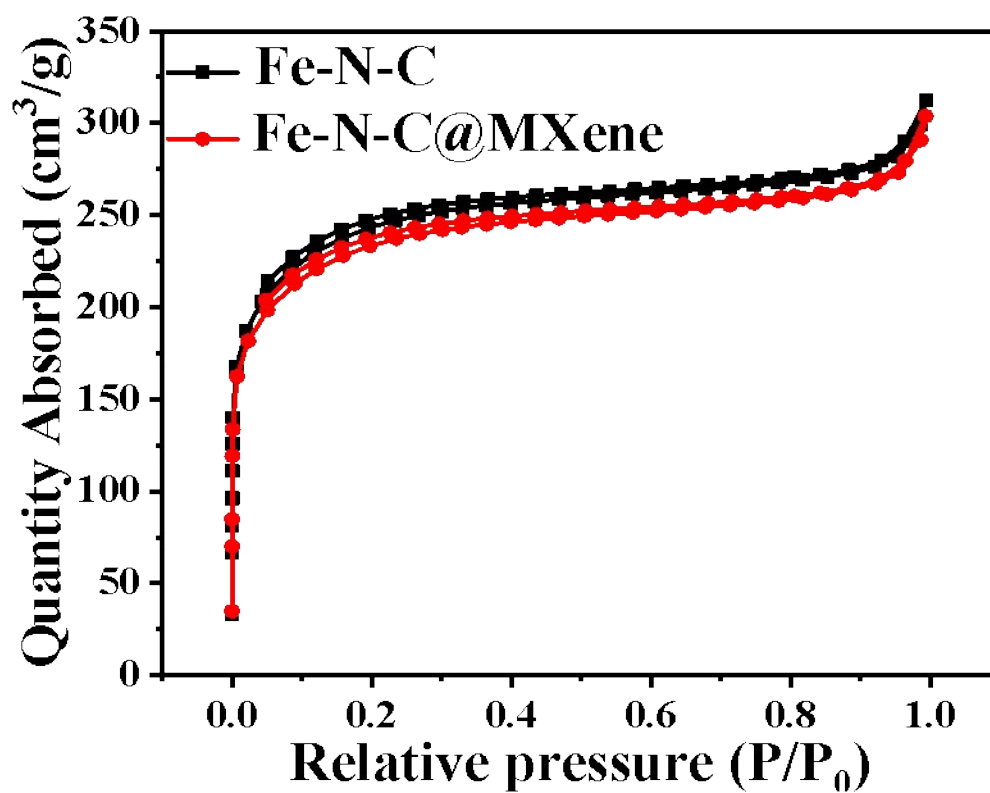

Figure S2. Nitrogen adsorption-desorption isotherms of Fe-N-C and Fe-N-C@MXene.

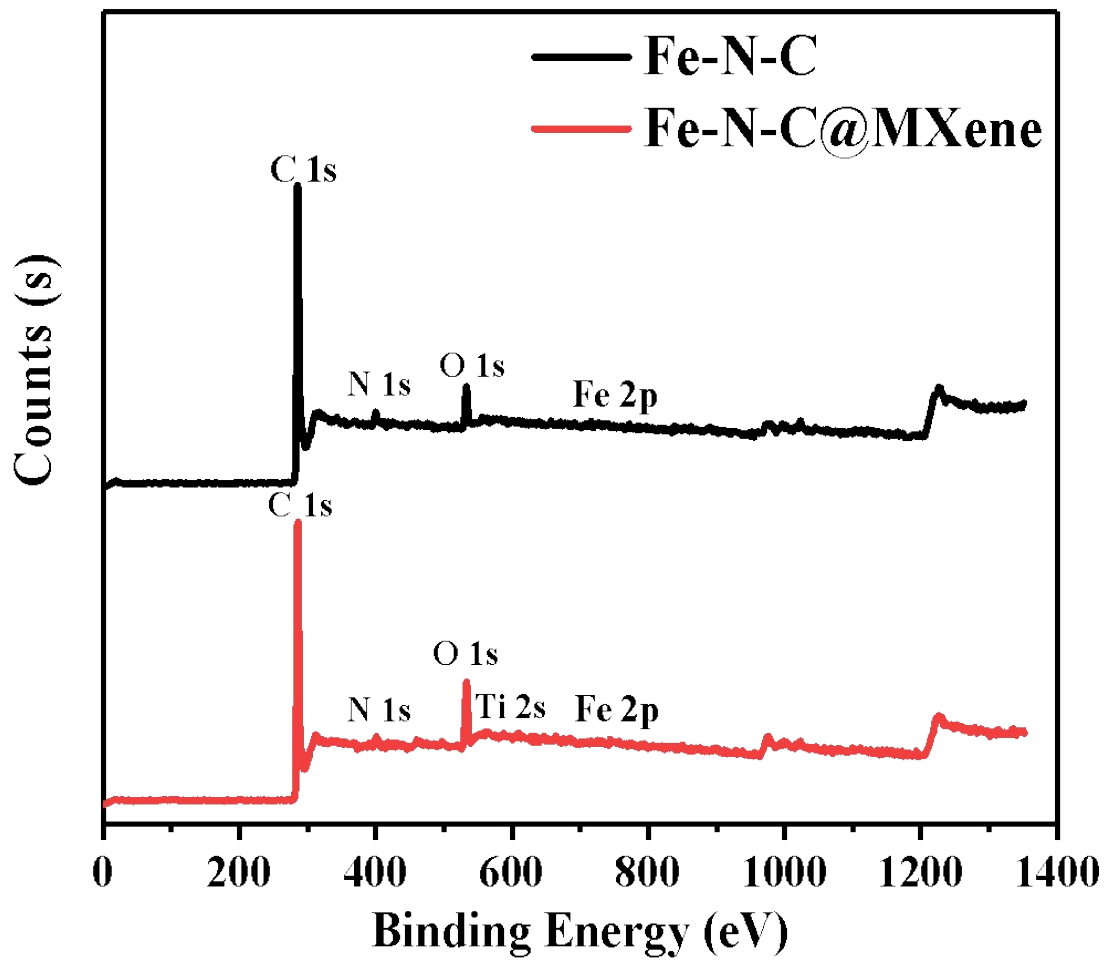

Figure S3. XPS spectra of Fe-N-C and Fe-N-C@MXene.

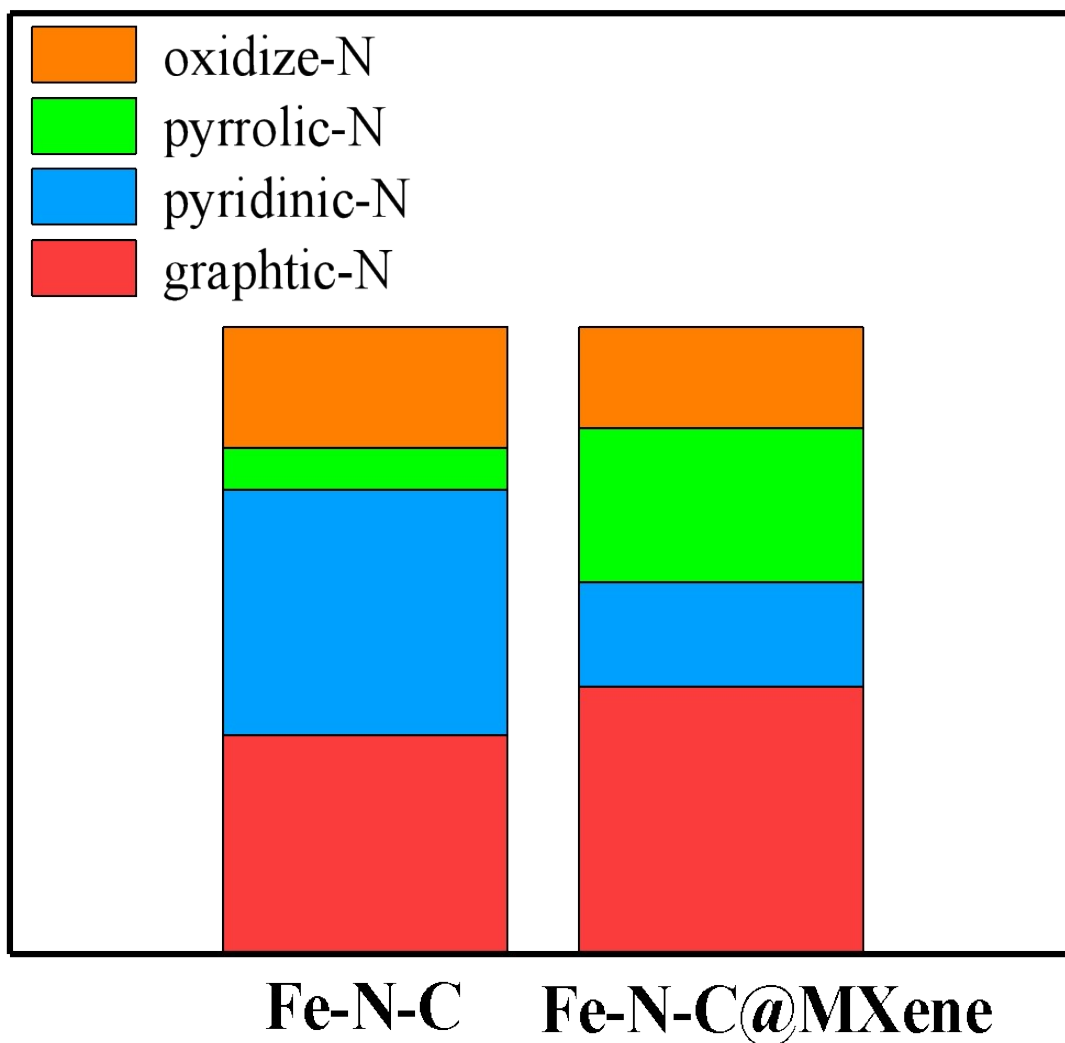

**Figure S4.** Detailed proportion of pyridinic-N, pyrrolic-N, graphitic-N, and oxidize-N for Fe-N-C and Fe-N-C@MXene

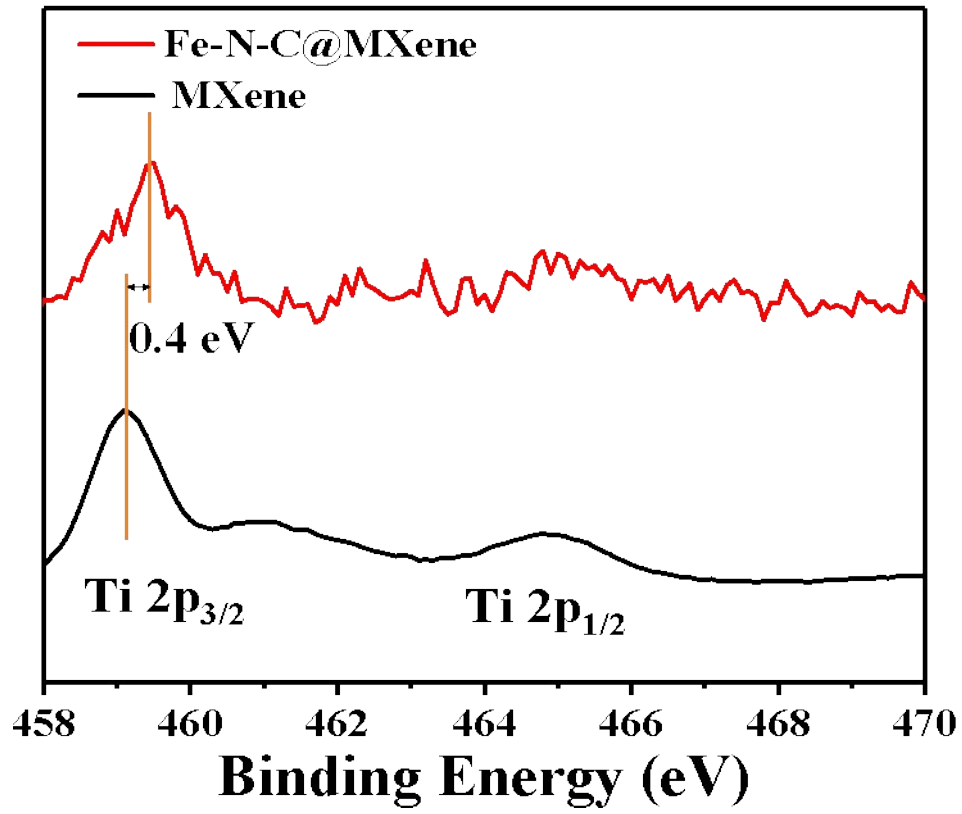

**Figure S5.** High-resolution XPS spectra of Ti 2p for MXene and Fe-N-C@MXene.

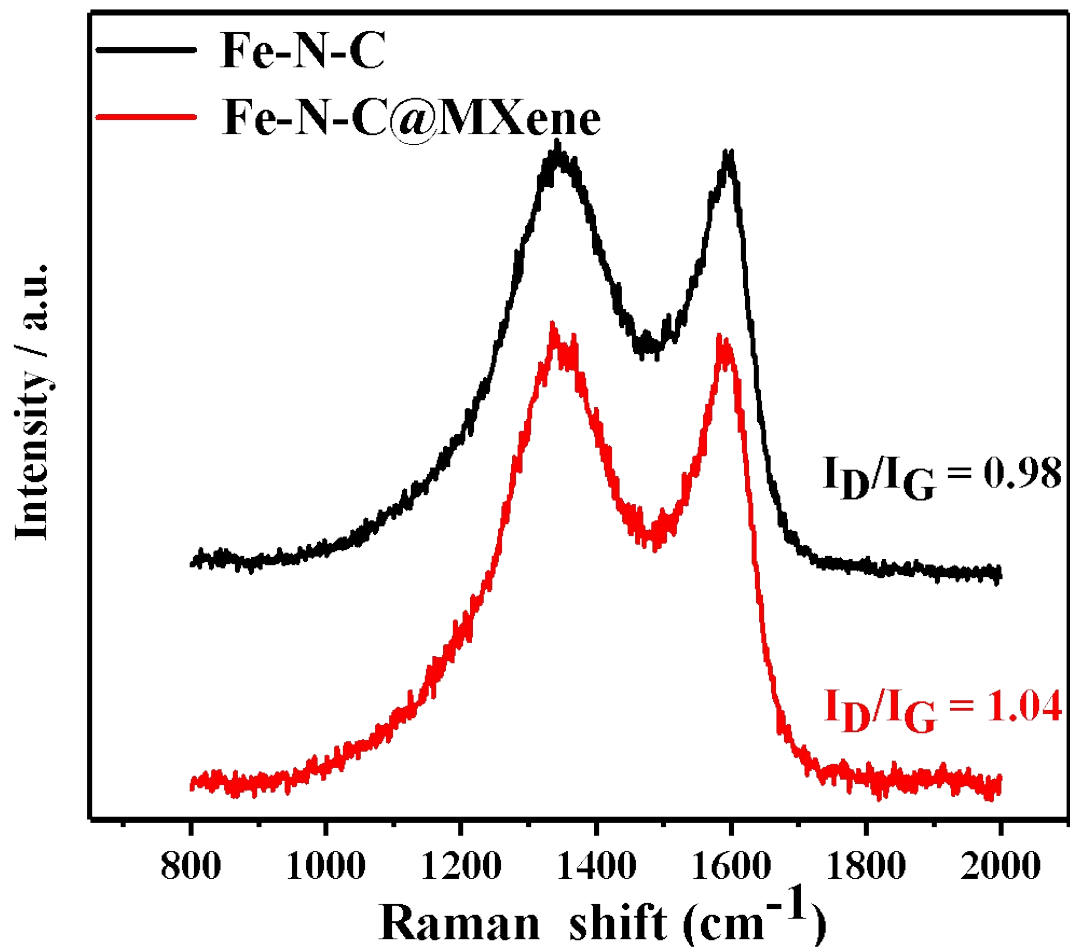

Figure S6. Raman spectra of Fe-N-C and Fe-N-C@MXene

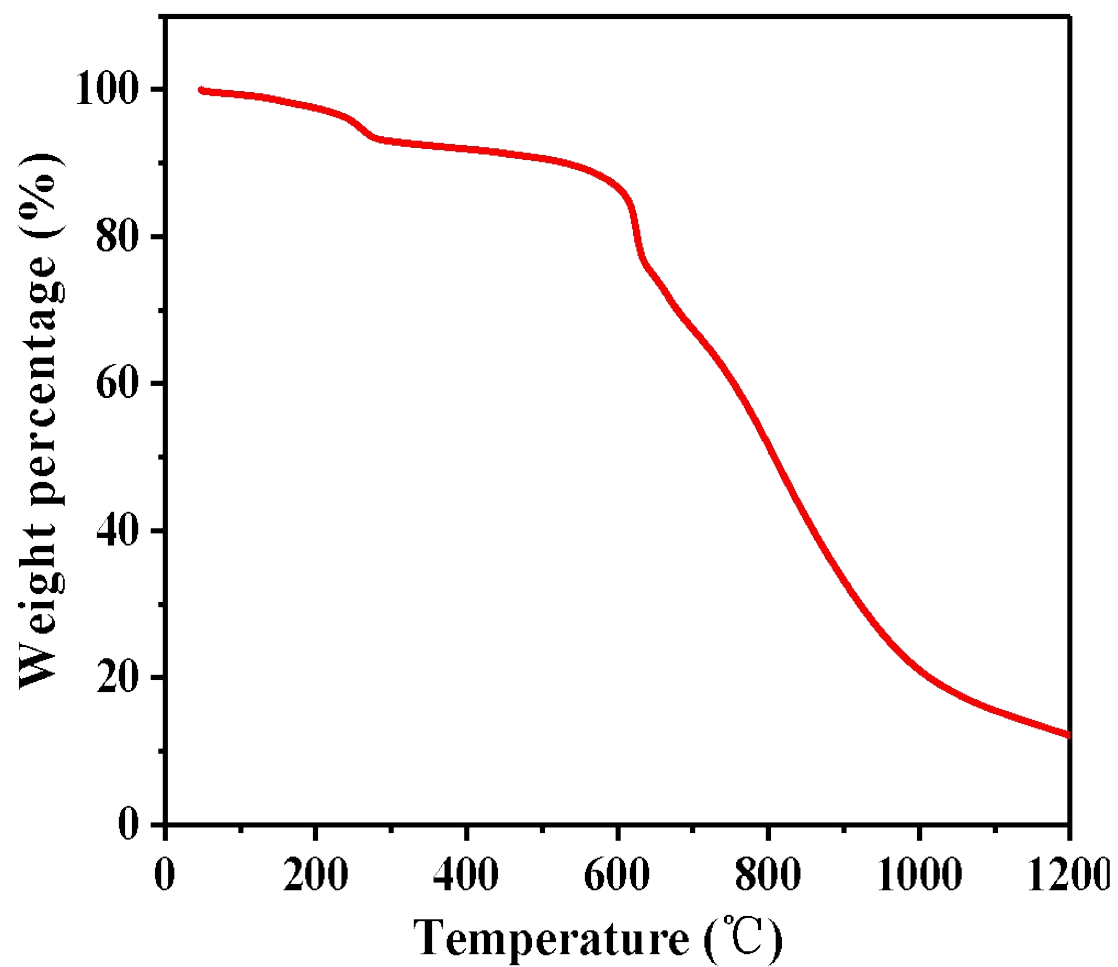

**Figure S7.** Thermogravimetry curve of Fe-doped ZIF-8 heated in a high purity nitrogen atmosphere.

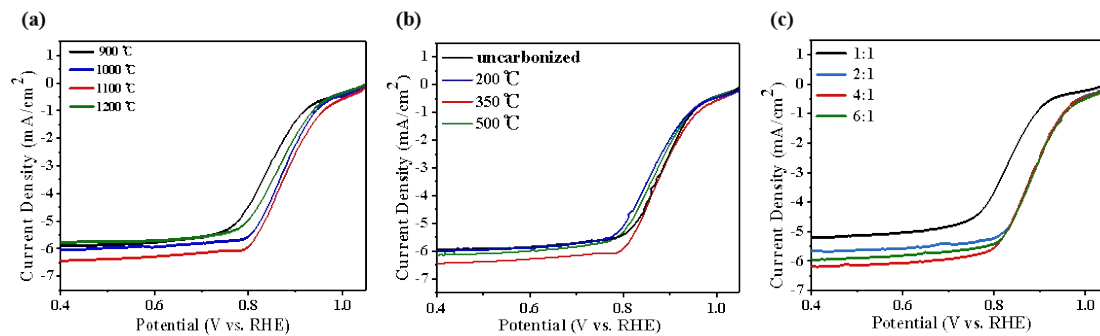

**Figure S8.** LSV curves of samples a) under different initial carbonization temperatures, b) synthesized under different second carbonization temperatures, c) with different mass ratios.



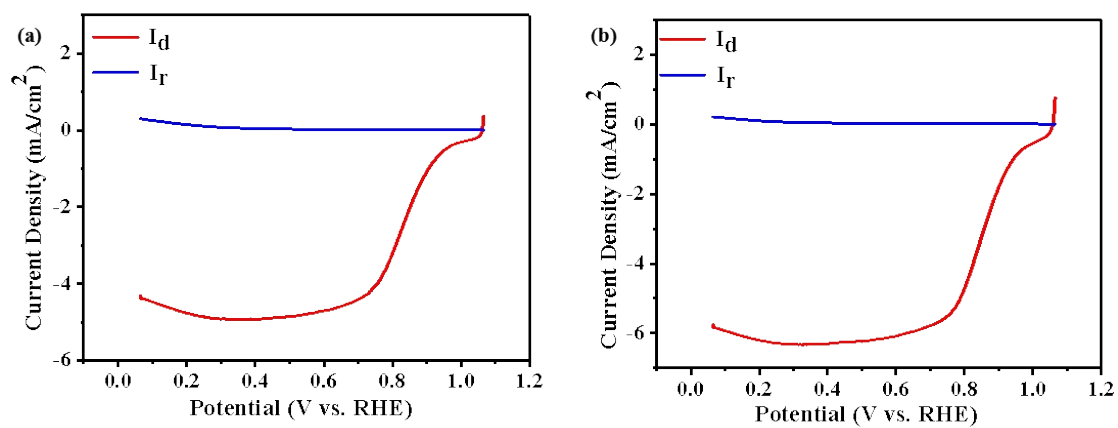

**Figure S9.** I<sub>d</sub> and I<sub>r</sub> of (a) Fe-N-C and (b) Fe-N-C@MXene under 1600 rpm in 0.1 M KOH.

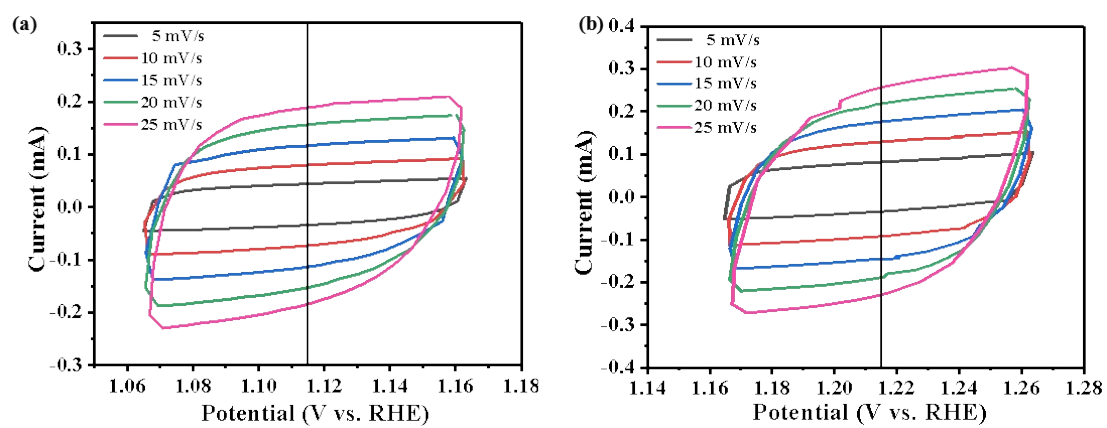

**Figure S10.** Cyclic voltammetry curves of (a) Fe-N-C and (b) Fe-N-C@MXene under different scan rates in 0.1 M KOH.

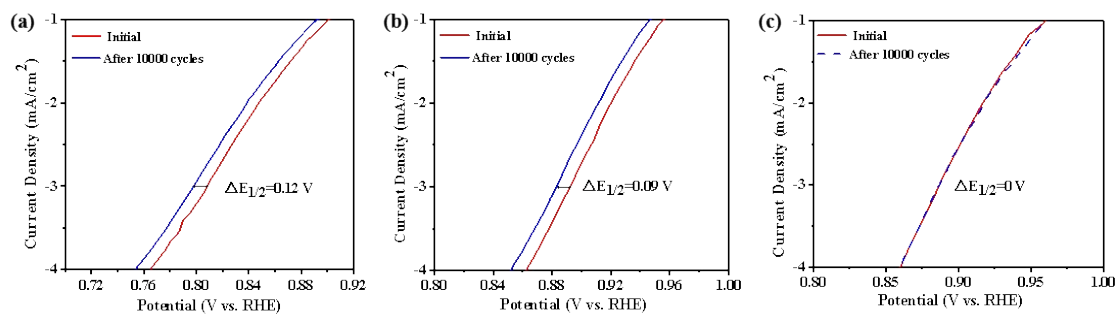

**Figure S11.** The attenuation of half-wave potential of (a) Fe-N-C, (b) Pt/C and, (c) Fe-N-C@MXene after 10,000 cycles of CV in 0.1 M KOH.

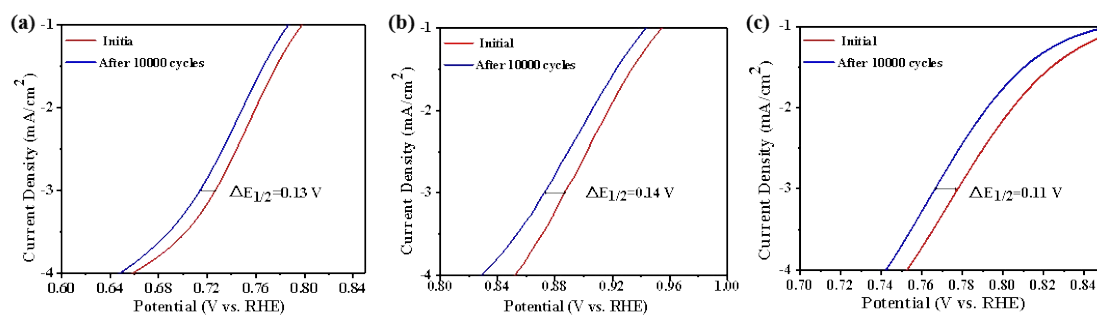

**Figure S12.** The attenuation of half-wave potential of (a) Fe-N-C, (b) Pt/C, and (c) Fe-N-C@MXene after 10,000 cycles of CV in 0.1 M HClO<sub>4</sub>.

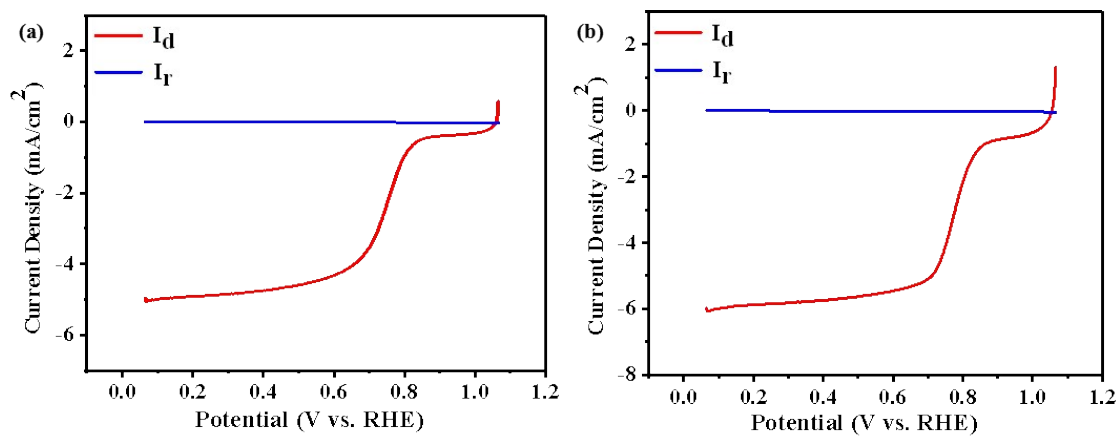

**Figure S13.** I<sub>d</sub> and I<sub>r</sub> of (a) Fe-N-C and (b) Fe-N-C@MXene under 1600 rpm in 0.1 M HClO<sub>4</sub>.

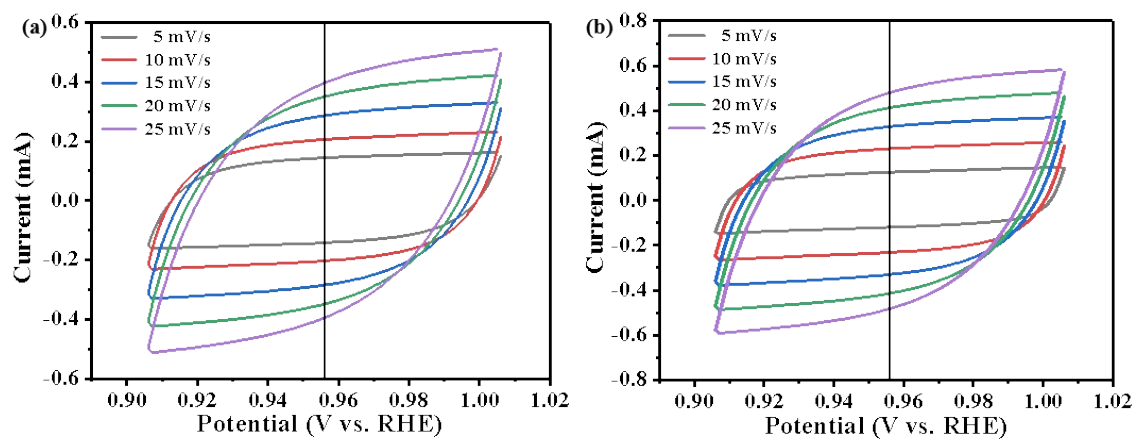

**Figure S14.** Cyclic voltammetry curves of (a) Fe-N-C and (b) Fe-N-C@MXene under different scan rates in 0.1 M HClO<sub>4</sub>.

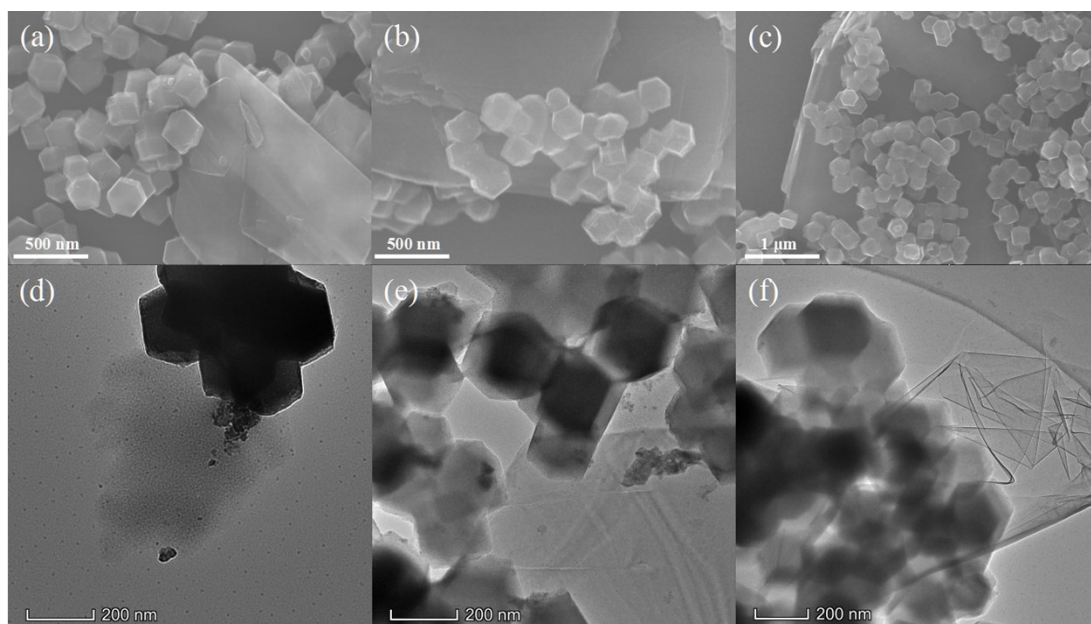

**Figure S15.** (a-c) SEM and (d-f) TEM images of Fe-N-C@MXene after 10,000 cycles in 0.1 M KOH.

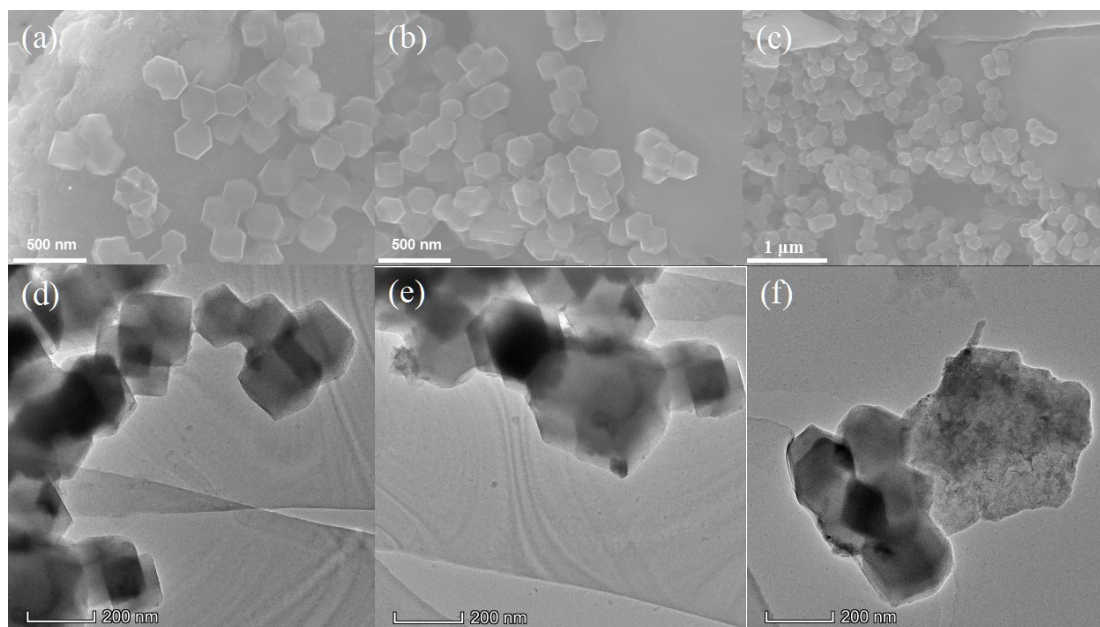

**Figure S16.** (a-c) SEM and (d-f) TEM images of Fe-N-C@MXene after 10,000 cycles in 0.1 M HClO<sub>4</sub>.



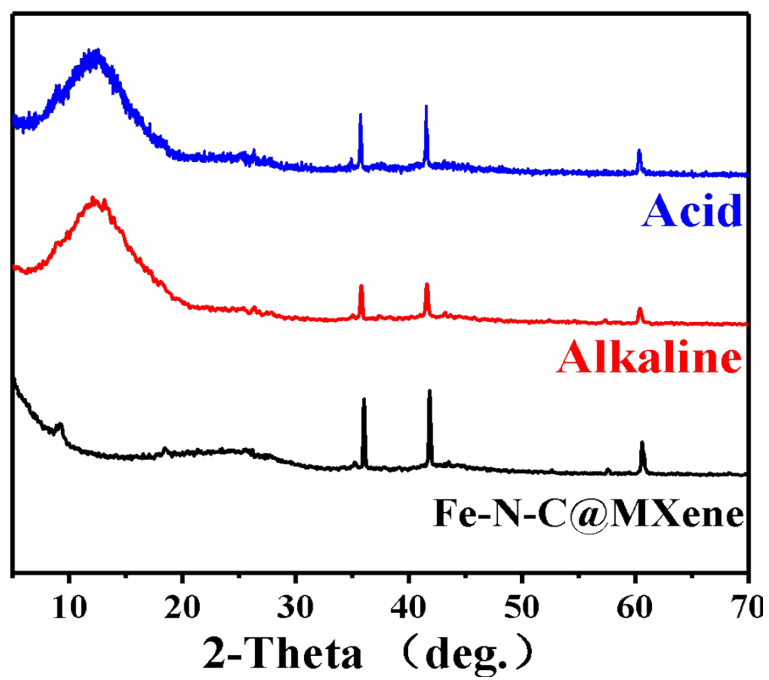

**Figure S17.** XRD spectra of Fe-N-C@MXene after 10,000 cycles in 0.1 M KOH (red line) and in 0.1 M HClO<sub>4</sub> (blue line).

**Table 1.** Comparisons of the ORR performance of M-N-C catalysts for the recently published papers.

| Catalysts                                | $E_{1/2}$<br>(V) | $i_d$<br>(mA/cm <sup>2</sup> ) | $\Delta E_{1/2}$<br>(mV) | Electrolyte             | Ref.             |
|------------------------------------------|------------------|--------------------------------|--------------------------|-------------------------|------------------|
| <b>Fe-N-C-950</b>                        | 0.78             | 5.2                            | 12 (10k cycles)          | 0.1 M HClO <sub>4</sub> | 1                |
| <b>Czif-Fe(acac)3-6</b>                  | 0.805            | 5.2                            | 19 (10k cycles)          | 0.1 M HClO <sub>4</sub> | 2                |
| <b>C-Fe-Z8-Ar</b>                        | 0.82             | 7.5                            | 40 (10k cycles)          | 0.1 M HClO <sub>4</sub> | 3                |
| <b>Fe-N-C/H<sub>2</sub>O<sub>2</sub></b> | 0.78             | 7.3                            | 13 (20k cycles)          | 0.1 M HClO <sub>4</sub> | 4                |
| <b>Fe-N-C-3</b>                          | 0.805            | 5.3                            | 18 (10k cycles)          | 0.1 M HClO <sub>4</sub> | 5                |
| <b>FeNC-900</b>                          | 0.848            | 7.0                            | 9 (5k cycles)            | 0.1 M KOH               | 6                |
|                                          | 0.709            | 6.8                            | 16 (5k cycles)           | 0.1 M HClO <sub>4</sub> |                  |
| <b>Fe-N-C@MXene</b>                      | <b>0.887</b>     | <b>6.3</b>                     | <b>0 (10k cycles)</b>    | <b>0.1 M KOH</b>        | <b>This work</b> |
|                                          | 0.777            | 5.7                            | 11 (10k cycles)          | 0.1 M HClO <sub>4</sub> |                  |

## References

1. M. Xiao, J. Zhu, L. Ma, Z. Jin, J. Ge, X. Deng, Y. Hou, Q. He, J. Li, Q. Jia, S. Mukerjee, R. Yang, Z. Jiang, D. Su, C. Liu and W. Xing, *ACS Catal.*, 2018, 8, 2824-2832.
2. L. Gao, M. Xiao, Z. Jin, C. Liu, J. Zhu, J. Ge and W. Xing, *J. Energy Chem.*, 2018, 27, 1668-1673.
3. X. Wang, H. Zhang, H. Lin, S. Gupta, C. Wang, Z. Tao, H. Fu, T. Wang, J. Zheng, G. Wu and X. Li, *Nano Energy*, 2016, 25, 110-119.
4. X. Wei, X. Luo, H. Wang, W. Gu, W. Cai, Y. Lin and C. Zhu, *Appl. Catal. B-Environ.*, 2020, 263.
5. L. Gao, M. Xiao, Z. Jin, C. Liu, J. Ge and W. Xing, *J. Energy Chem.*, 2019, 35, 17-23.
6. Z. Li, X. Liang, Q. Gao, H. Zhang, H. Xiao, P. Xu, T. Zhang and Z. Liu, *Carbon*, 2019, 154, 466-477.
